1 **Molecular epidemiology of Colombian *Histoplasma capsulatum* isolates shows their**  
2 **polyphyletic behavior and point out raw chicken manure as one of the infections**  
3 **sources.**

4

5 Luisa F. Gómez<sup>a,b</sup>, Myrtha Arango<sup>a</sup>, Juan G. McEwen<sup>a,c</sup>, Oscar M. Gómez<sup>b,c</sup>, Alejandra Zuluaga<sup>d</sup>,  
6 Carlos A. Peláez<sup>e</sup>, Jose M. Acevedo<sup>e</sup>, María L. Taylor<sup>f</sup>, María del P. Jiménez<sup>a#</sup>.

7

8 <sup>a</sup> Grupo de Micología Médica, Departamento de Microbiología y Parasitología, Facultad de  
9 Medicina, Universidad de Antioquia. Medellín, Colombia.

10 <sup>b</sup> Posgrado de Biología, Instituto de Biología, Facultad de Ciencias Exactas y Naturales,  
11 Universidad de Antioquia. Medellín, Colombia.

12 <sup>c</sup> Grupo de Biología Celular y Molecular, Corporación para Investigaciones Biológicas (CIB),  
13 Universidad de Antioquia. Medellín, Colombia.

14 <sup>d</sup> Grupo de Micología Médica y Experimental, Corporación para Investigaciones Biológicas  
15 (CIB). Universidad de Antioquia. Medellín, Colombia.

16 <sup>e</sup> Grupo Interdisciplinario de Estudios Moleculares, (GIEM), Instituto de Química, Facultad de  
17 Ciencias Exactas y Naturales, Universidad de Antioquia. Medellín, Colombia.

18 <sup>f</sup> Laboratorio de Inmunología de Hongos, Departamento de Microbiología y Parasitología,  
19 Facultad de Medicina, Universidad Nacional Autónoma de México. Ciudad de México, México.

20

21 Running Head: Molecular epidemiology of Colombian *H. capsulatum*

22

23 # Address correspondence to Maria del P. Jiménez, [delpilar.jimenez@udea.edu.co](mailto:delpilar.jimenez@udea.edu.co)

24

## 25 **Key words**

26 Histoplasmosis, organic fertilizers and soil amendments, MLST technique, Hc100 nested PCR.

27

## 28 **Abstract**

29       The thermally dimorphic fungus *Histoplasma capsulatum* is the causative agent of  
30 histoplasmosis, which is the most prevalent endemic mycosis in America. The replacement of  
31 organic matter in agro-ecosystems is necessary in the tropics, and the use of organic fertilizers  
32 has increased. Cases and outbreaks due to the presence of the fungus in these components  
33 have been reported. In Colombia, chicken manure is the most common raw material in the  
34 organic fertilizers production. In this work, we reached the isolation of the fungus from a  
35 chicken manure. Then, we were able to compare genetically 3 environmental isolates with 42  
36 Colombian human clinical isolates. The genetic comparison showed the environmental  
37 isolates grouping together with the clinical isolates. This result suggests chicken manure as  
38 one of the infection source with *H. capsulatum*. Also, the phylogenetic analysis using another  
39 *H. capsulatum* isolates from databases showed that the Colombian isolates widely distributed  
40 in the relation tree. This result pointed out the great genetic diversity among *H. capsulatum*  
41 Colombian population.

42

## 43 **Introduction**

44 Histoplasmosis is a disease caused by the thermally dimorphic fungus *Histoplasma*  
45 *capsulatum* (*H. capsulatum*) that has been documented in all continents except Antarctica. In  
46 America, it is highly endemic, particularly in the Ohio and Mississippi river valleys. Estimates  
47 based on intradermal skin tests indicate that approximately 90% of the people has been in  
48 contact with the fungus (1–4).

49 *H. capsulatum* infection occurs when a contaminated area is disturbed, which causes  
50 aerosolization and subsequent inhalation of infective hyphal fragments and microconidia.  
51 Once these particles are inhaled and reach alveoli, the body temperature stimulates a switch  
52 from mycelium to yeast form. Histoplasmosis disease development depends on host factors  
53 such as immune system and lung conditions as well as fungal factors such as virulence and the  
54 amount of inhaled infecting particles. This interaction gives rise to different clinical forms of  
55 the disease, ranging from an asymptomatic form to a severe disease that can be lethal (1–4).

56 *H. capsulatum* was first isolated from soil in 1945 by Emmons (5), who after observed  
57 an environmental association between the fungus and some animals such as bats and hens (6,  
58 7). Later, other researchers, through the study of outbreaks, identified sources of infection and  
59 validated the relation between *H. capsulatum* with bats and birds manure (8–14). These  
60 studies made it possible to delineate populations at risk of histoplasmosis, since most cases  
61 have been described in ecotourists, speleologists, archaeologists, construction workers,  
62 poultry farmers, chicken manure collectors, organic fertilizers producers, farmers, and in  
63 general, all whose handle organic fertilizers. For the above, histoplasmosis has been defined  
64 as an occupational and recreational disease (12, 15–24).

65 In Colombia, Histoplasmosis report is not mandatory, nevertheless outbreaks and  
66 cases has been described. Some of the outbreaks have been related with the handle of organic  
67 fertilizers and its raw materials. Ordoñez et al. in 1997, made the compilation of 12 outbreaks  
68 occurred in the Colombian Andean Region, in 10 of those outbreaks the infection source was  
69 identified and in 2 the infection source were the handle of chicken manure contaminated with  
70 *H. capsulatum*. Then in 2002, Jimenez et al. described an outbreak comprised a family who get  
71 infected after fertilized a plant with a soil enriched with a *H. capsulatum* contaminated chicken  
72 manure . In Colombia, a total of 18 outbreaks of Histoplasmosis has been described, on those  
73 415 people get exposed and 188 (45.3%) were identified as infected. The source of infection  
74 were mostly related with environmental sources especially caves visiting and chicken manure  
75 handling (16, 20).

76 In the tropical agro-ecosystems the reconstitution of the organic matter is needed, then  
77 organic fertilizers are widely used. In Colombia, the most common raw material in the  
78 production of organic fertilizers and amendments is chicken manure. Therefore, if *H.*  
79 *capsulatum* is found associated with chicken manure and also this is the principal raw  
80 material for organic fertilizers production in Colombia, then there are a lot of people exposed  
81 to the fungus.

82 In order to call the attention about the high frequency of *H.capsulatum* in tropical  
83 environments and make mandatory the histoplasmosis report and to design preventive  
84 measures addressed to protect the people who are mainly exposed like chicken manure  
85 collectors, organic fertilizers producers, or any people who handle these products, two steps  
86 are needed. First, we must to demonstrate the presence of the fungus in those substrates and

87 second, we must to prove the relation between the isolates obtained from organic fertilizers  
88 or chicken manure with the isolates obtained from human clinical cases. In a previous work,  
89 we developed and applied a protocol based on the Hc100 nested PCR to search the genetic  
90 material of *H. capsulatum* in composted organic fertilizers, soils samples from caves and bird  
91 excretes. Then we detected *H. capsulatum* DNA in 10% of the tested samples (25). The present  
92 work was addressed to isolate *H. capsulatum* from Colombian environmental samples that  
93 tested positive by Hc100 nested PCR, in order to compare environmental isolates of the  
94 fungus with the Colombian clinical ones based on genetic differences by Multi-Locus  
95 Sequencing Typing (MLST).

96 Since the 1980's, numerous studies have evaluated the genetic variation of *H.*  
97 *capsulatum* population using typing techniques such as Restriction Fragment Long  
98 Polymorphism (RFLP) (26–30), Variable Number of Tandem Repeats (VNTR) (31), MultiLocus  
99 Sequence Typing (MLST) (32) and Whole Genome Sequencing (WGS) (33). These studies have  
100 consistently shown a strong association between phylogenetic clusters and geographic origin.  
101 The currently accepted taxonomy indicates there are 8 distinct groups of *H. capsulatum*, based  
102 on MLST analysis of over 130 isolates with focus on four single copy genes including fatty acid  
103 desaturase (*ole*),  $\beta$  tubulin 1 (*tub*), ATP ribosylation factor (*arf*) and H antigen (*H -anti*) (34,  
104 35). However, as with many microorganisms, taxonomic status remains dynamic with even  
105 more recent research arguing *H. capsulatum* should be broken up into 4 completely separate  
106 species: *H. mississippiense*, *H. ohioense*, *H. suramericanum* and *H. capsulatum sensu stricto*  
107 (*Sepulveda et al. 2017*).

108           The *H. capsulatum* Colombian population has been represented in previous typing  
109 studies by 16 Colombian clinical isolates. Interestingly, these isolates have shown marked  
110 differences among them relative to other *H. capsulatum* groups. The works by Kasuga et al.  
111 (1999, 2003), and Teixeira et al. (2016) show a high degree of variability among the  
112 Colombian isolates by MLST. The Kasuga's work placed the Colombian isolates in Latin  
113 American clades (LAm) LAm A, LAm B and 2 solitary lineages. Similarly, the work achieved by  
114 Teixeira et al. (2016) placed the Colombian isolates in the phylogenetic species LAm B1, LAm  
115 A1 and LAm A2. Finally, Sepulveda et al. (2017), evaluated two additional Colombian clinical  
116 isolates, MV3 and MZ5, which they argue are so divergent that they should be reclassified into  
117 two different species: *H. capsulatum sensu stricto* and *H. suramericanum*, respectively. It is  
118 important to point out these two isolates are different from the 16 previously used in other  
119 molecular epidemiology or speciation works. Despite the fact that only a small number of  
120 isolates have been studied, the existing data indicate a great diversity among the *H.*  
121 *capsulatum* Colombian population (31–35).

122           Here we showed the presence of *H. capsulatum* in the Colombian environment and  
123 describe the genetic analysis of *H. capsulatum* Colombian population by MLST using both  
124 clinically relevant molecular markers as well as the sequences of genes used for diagnosis  
125 purposes including the partial sequence of 100 KDa protein (Hc100), M antigen (AgM) and  
126 two Sequences Characteristic Amplified Randomly (SCAR) (34–39).

127

## 128 **Materials and Methods**

129

130 **Search for *H. capsulatum* Colombian isolates from environmental sources**

131

132 ***Environmental samples collection***

133 Samples were collected from organic fertilizers, which were the compost products  
134 from an organic matter source (i.e., food scraps, pruning material, straw, or sawdust) and a  
135 nitrogen source (i.e., excrement from animals, primarily poultry or other birds), soil from cave  
136 floors and bird and bat droppings. Between 500 and 1000 grams of each environmental  
137 sample was placed in a plastic zip lock bag and labeled with the date, geographical  
138 coordinates, and the type of sample (raw material, composted material, cave soil, bat excretes  
139 or chicken excretes). Samples were then sent to the Grupo de Micología Médica, School of  
140 Medicine, Universidad de Antioquia to be processed.

141 393 samples were collected between 2010 and 2017. Of these 393 samples, 273  
142 (69.5%) were composted fertilizers and organic amendments. A total of 120 (30.5%) samples  
143 did not have composting treatment. In the last group, 21 (5.3%) samples were from caves  
144 floors and/or bat droppings and a total of 99 (25.2%) samples were from bird depositions or  
145 chicken manure.

146

147 ***DNA extraction from environmental samples using the "FastDNA SPIN Kit for Soil"***

148 The FastDNA SPIN Kit For Soil® (MP Biomedicals, Santa Ana, CA, USA) was used to  
149 extract DNA from environmental samples using the manufacturer's instructions with some  
150 modifications. Briefly, the extraction was performed using the supernatant obtained from the  
151 suspension of 10 g of sample in 30 ml of saline solution containing 0.001% Tween 80 and

152 0.1% antibiotics (gentamycin and penicillin). The suspension was stirred vigorously for 1 min  
153 and allowed to settle for 20 min. This procedure was repeated twice. After the last stirring, the  
154 suspension was allowed to settle only until the largest particles were settled; then, 300  $\mu$ l of  
155 supernatant was collected for DNA extraction. The other modification consisted of an  
156 increased contact time between the sample and kit reagents (25).

157

### 158 ***Nested Hc100-PCR assay for searching *H. capsulatum* in environmental samples***

159 Two sets of specific primers targeting a fragment of the *Hcp100* gene were used (36,  
160 37). The conditions of the assay for organic fertilizers were described by Gomez et al. (2018)  
161 (25). In the first reaction, 10 $\mu$ l of DNA was added to 50 $\mu$ l total reaction mix with a final  
162 concentration of 10 mM Tris - HCl (pH 8.3), 50 mM KCl, 2 mM MgCl<sub>2</sub>, 1U Taq polymerase  
163 (Thermo Scientific, Ref: EP0402. Waltham, M A, USA), 0.2 mM of each primer (HcI-HcII), and  
164 0.2mM deoxynucleoside triphosphate (Thermo Scientific, Ref: R0181. Waltham, M A, USA).  
165 The mixture for the nested PCR was similar, except using 2 $\mu$ l of the product of the first PCR  
166 and 0.2mM of the inner primers (HcIII-HcIV). Temperatures and times for the first reaction,  
167 containing external primers HcI-HcII were one cycle at 94°C for 5 min; 35 cycles at 94°C for  
168 30s, 66°C for 1 min, and 72°C for 1 min, and then a final cycle of 72°C for 5 min. For the second  
169 step, the reaction consisted of a cycle at 94°C for 5 min; 35 cycles at 94°C for 30s, 65°C for 30s,  
170 and 72°C for 1 min, and then a final extension cycle at 72°C for 5 min. Synthesis of the primers  
171 was performed by Integrated DNA Technologies (IDT, Coralville, IA, USA).

172

### 173 ***Agarose gel electrophoresis***



174 Agarose gels (Amresco, Ref.: N605-500G, Solon, OH, USA) prepared at 1.5% in Tris-  
175 borate EDTA buffer (TBE) were used to visualize the amplification products of the Hc100  
176 nested PCR. Electrophoresis was performed for 40 min at 80 V with 10 µl of the PCR product  
177 and 5 µl of GelRed Nucleic Acid Gel stain (Biotum. Ref.: 41003, Hayward, CA, USA) in each lane.  
178 The bands were visualized and documented in a UV transilluminator (Doc Gel™, BioRad.  
179 Hercules, CA, USA).

180

181 ***H. capsulatum* recovery in microbiological cultures from environmental samples that**  
182 ***tested positive in the Hc100 nested PCR***

183 The culture was performed using the supernatant obtained from the suspension of 10  
184 g of sample in 30 ml of sterile saline solution 0.85% containing 0.001% Tween 80 (Sigma, ref.  
185 P4780. St. Louis, MO, USA), 100 pg/ml oxytetracycline (MK. Cali, Valle, COL), and 0.1%  
186 antibiotics (gentamycin and penicillin (MK. Cali, Valle, COL)). The suspension was stirred  
187 vigorously for 1 min and allowed to settle for 20 min. This procedure was repeated twice.  
188 After the last stirring, the suspension was allowed to sit until the largest particles were  
189 settled; then, the supernatant was collected and serial dilutions were performed 1:10, 1:100  
190 and 1:1000, from each dilution were plated 200 µl in Mycosel agar (BBL™; ref. 211462.  
191 Franklin Lakes, NJ, USA) by duplicate. Cultures were incubated at room temperature for 2  
192 months and plates were visually inspected on days 5, 10, 15, 30, 45 and 60 in order to look for  
193 growth of colonies with morphology that resemble *H. capsulatum*.

194 The colonies resembling *H. capsulatum* were identified as cottony colonies, raised,  
195 hard- edged, white, cream or light coffee and slow growth. Each candidate colony was

196 subcultured on a fresh Mycosel agar and the microscopic examination was done with  
197 Lactophenol blue to observe the characteristics indicative of *H. capsulatum* such as thin  
198 septate hyaline hyphae, thin wall microconidia and tuberous macroconidia. Colonies with  
199 these features were transformed into the yeast form using the procedure described in Gomez  
200 et al. (2018) (25). Isolate identities were confirmed with sequencing of *hcp100* gene.

201

### 202 ***H. capsulatum* recovery in mouse model from environmental samples that tested positive** 203 ***in the Hc100 nested PCR***

204

### 205 ***Assays conducive to establish the sensitivity of the mouse model***

206 The efficacy of isolating *H. capsulatum* from the environmental sample was evaluated  
207 with organic fertilizers samples contaminated with 3000 CFU/ml in mycelial stage (Gomez et  
208 al. in preparation manuscript). 1:10, 1:100 and 1:1000 dilutions were prepared from the  
209 sample supernatant and from each dilution, 2 mice were inoculated in the peritoneum cavity  
210 with 500  $\mu$ l. The animals maintenance is explained below.

211

### 212 ***Environmental samples preparation for mice inoculation***

213 Hc100 nested PCR positive samples were prepared by suspending 10 g of sample in  
214 100 ml of saline solution containing 0.1% antibiotics (gentamycin and penicillin). The  
215 suspension was stirred vigorously for 1 minute and allowed to settle for 20 minutes. This  
216 procedure was repeated twice. After the last stirring, the suspension was allowed to settle 40  
217 minutes; then, the supernatant was collected for mice inoculation.

218

219 ***Animals' maintenance and inoculation***

220 Specific pathogen-free male Balb/C mice (6–8 week old, 18–22 g weight) were  
221 obtained from the Laboratory Animal Center at the Corporación para Investigaciones  
222 Biológicas (CIB, Medellin, Colombia). Mice were housed in a caging system (RAIR HD Super  
223 Mouse 750™ Racks system, Lab Products, Inc. Seaford, DE, USA) equipped with high  
224 efficiency particulate air (HEPA) filters with controlled room temperature at 20–24°C; and 12-  
225 h light/dark cycles, under sterile conditions and provided with sterilized food and water *ad*  
226 *libitum*.

227 Mice were inoculated in the peritoneum cavity with 500µl of the supernatant. After 17  
228 days, mice were euthanized and the affected organs (spleen, liver and lungs) were extracted.  
229 The organs were macerated and cultured in BHI agar (Brain Heart Infusion Agar, BBL™; ref.  
230 211065. Franklin Lakes, NJ, USA) supplemented with 1% glucose (Sigma, Ref. G5400. St. Louis,  
231 MO, USA), 0.001% L-cysteine (Sigma, ref. C - 7755. St. Louis, MO, USA) and 5% anticoagulated  
232 blood, then cultures were incubated at 37°C in 5% CO<sub>2</sub> atmosphere for two weeks and at room  
233 temperature in Mycosel agar for 2 months, in order to look for *H. capsulatum* compatible yeast  
234 colonies.

235

236 ***Ethics statement.***

237 This study was performed according to recommendations of European Union,  
238 Canadian Council on Animal Care, and Colombian regulations (Law 84/1989, Resolution No.

239 8430/1993). The protocol was approved by the Ethics' Research Committee at the CIB  
240 (Comité de ética, electronic consultation on July 24<sup>th</sup>, 2014).

241

## 242 **Collection of Colombian *H. capsulatum* clinical isolates**

243

### 244 ***H. capsulatum* culture**

245 42 human clinical isolates of *H. capsulatum* were obtained from the CIB (CIB, Medellín,  
246 Colombia). All isolates were transformed into the yeast form following the procedure were  
247 described in Gomez et al. (2018) (25).

248

### 249 ***DNA extraction from H. capsulatum* isolates in yeast phase**

250 The phenol-chloroform-isoamyl alcohol method was used for DNA extraction from the  
251 *H. capsulatum* isolates in yeast phase (40). The DNA concentration and quality were evaluated  
252 with a NanoDrop ND1000 spectrometer (Thermo Scientific, Wilmington, DE, USA) and 1%  
253 agarose gel electrophoresis, respectively

254

## 255 **Molecular epidemiology comparison among *H. capsulatum* population.**

256

### 257 ***MLST* technique**

258 The characteristics of the technique to compare the isolates of *H. capsulatum* were  
259 described by Kasuga, Taylor and White (1999) (34). The primers were synthesized by

260 Integrated DNA Technologies (IDT, Coralville, IA, USA). Table S2 describes the characteristics  
261 of each primer.

262 The standardized conditions for each MLST PCR assay and primers used are described  
263 on Table S2.

264

### 265 ***Other selected and evaluated H. capsulatum genome regions to compare isolates***

266 Given the difficulties associated with obtaining isolates from environmental samples,  
267 diagnostic protocols originally designed for clinical samples were standardized and applied in  
268 environmental samples to obtain sequences directly from the samples to enable comparison  
269 between clinical and environmental *H. capsulatum* isolates. To fulfil this goal only the first  
270 round of the Hc100 Nested PCR and antigen M nested PCR assays were done because the  
271 amplification product is bigger. Additionally, two PCR assays targeting two Sequences  
272 Characteristic Amplified Randomly (SCAR) in the *H. capsulatum* genome were also used. Table  
273 S2 describes the characteristics of each primer and PCR reaction.

274

### 275 ***Sequences analyses***

276 Bidirectional sequencing of the PCR amplification products were performed using the  
277 chain termination method. The method used ABI 3730XL DNA sequencing technology with  
278 quality criteria QV20 (Macrogen Inc., Geumcheon-gu, Seoul, Korea). The obtained sequences  
279 were edited manually based on the chromatograms. The mold and complementary sequences  
280 were aligned and the consensus sequence was obtained using Geneious 11.0.2. Software.  
281 BLAST (<http://blast.ncbi.nlm.nih.gov/Blast.cgi>) was used to verify that the sequenced PCR

282 products belonged to *H. capsulatum*. It was obtaining the information of the 80 sequences  
283 from TreeBASE #1063, the matrix was separated gene by gene according to the length and the  
284 order reported by the author (34). Additionally, the sequences of 85 isolates were  
285 downloaded from NCBI using the access codes by the Batch entrez program. Additionally, the  
286 sequences were aligned and concatenated using Geneious 11.0.2. Software, and the distance  
287 trees were constructed using the Maximum Likelihood and 10000 UltrafastBootstrap methods  
288 using IqTree 1.4.4. Software. The tree obtained was visualized using FigTree v.1.4.3.

289

## 290 **Results**

291

### 292 **Detection of *H. capsulatum* in environmental samples by Hc100 nested PCR**

293 Out of the 393 environmental samples, a total of 39 (9.9%) were positive by Hc100  
294 nested PCR. Of these positive samples, 21 (5.3%) were composted fertilizers and organic  
295 amendments, 17 samples (4.3%) were from bird depositions or poultry manure and one  
296 (0.3%) sample was from a cave floor/bat droppings. Interestingly, we found high positivity  
297 rates of samples without composting treatment 18/120 (15%) compared with the samples  
298 that were previously composted 21/273 (7.7%).

299

### 300 **Recovery of *H. capsulatum* in microbiological cultures from Hc100 nested PCR positive** 301 **environmental samples**

302 The 39 positive samples by the Hc100 nested PCR were seeded into Mycosel culture  
303 medium. However, only one sample taken from non-composted chicken manure produced

304 viable *H. capsulatum* cultures. From this single sample, 3 *H. capsulatum* colonies were  
305 obtained and used as different individuals for molecular analyses. Interestingly, while 2 of  
306 these isolates were morphologically similar, the third was distinct and did not fully switch to  
307 the yeast form. Abundant growth of bacteria and molds, such as *Penicillium* spp, *Aspergillus*  
308 spp, *Trichoderma* spp and *Geotrichum* spp were also observed in the *H. capsulatum* cultures.

309

### 310 **Recovery of *H. capsulatum* in mouse model from Hc100 nested PCR positive** 311 **environmental samples**

312 In attempt to obtain more isolates, the 39 positive samples from the Hc100 nested PCR  
313 were also used to inoculate mice. 5 to 8 mice were used to inoculate each positive sample,  
314 around 9% of the mice died in the first 3 days after inoculation. Despite the use of broad-  
315 spectrum antibiotics such as oxytetracycline in the sample preparation, the administration of  
316 antibiotics to the mice before and after environmental samples inoculation and the rigorous  
317 observation of the mice tissue cultures in Mycosel and BHI, we were not able to obtain  
318 environmental isolates of *H. capsulatum*, although as it was described before *H.capsulatum*  
319 was recovered from mice inoculated with environmental samples artificially contaminated  
320 with 3000 CFU/ml of this fungus.

321

### 322 **MLST analysis of Colombian *H. capsulatum* populations**

323 The conditions of each PCR protocol were standardized (Table S2). Then the  
324 sensitivity, specificity and the ability to detect *H. capsulatum* DNA from environmental  
325 samples could be evaluated (Figure 1). All protocols, including both typing and diagnostic

326 methods, were tested to detect *H. capsulatum* from environmental samples. Although some of  
327 them showed a good limit of detection (Fig 1, Lanes 1-7) and specificity (Fig 1, Lanes 8-13)  
328 with spiked samples with *H. capsulatum* DNA, none of these methods produced an amplicon  
329 from the 39 samples shown to be positive with the Hc100 nested PCR.

330 The standardized PCR protocols were used to obtain the sequences from all 45  
331 Colombian isolates (42 human clinical and 3 environmental isolates) (Table S1), after the PCR  
332 products were sequenced, the consensus sequence was obtained. The length for each locus  
333 was as follows: *arf* 478 bp, *anti H* 413 bp, *ole* 428 bp, *tub* 263 bp, *100kda* 209 bp, *anti M* 276  
334 bp, *scar220* 208 bp, *scar230* 262 bp, ITS 605 bp. The characteristics of each gene are shown in  
335 the Table S2.

336 Subsequently, the first matrix was constructed using the sequences of the genes in the  
337 following order: *arf*, *antiH*, *tub1* and *ole*. The matrix included 225 sequences, had a length of  
338 1582 bp and was partitioned by the type of sequence itself: CDS, exon or ITS. The evolutionary  
339 model was established as K2+G4. 17 phylogenetic groups were identified with similar  
340 distribution as reported by Kasuga, 2003 and Teixeira, 2016 (Figure 2).

341 Additionally, three more matrices were built that only included the Colombian isolates,  
342 given that only from those were obtained the sequences corresponding to Hcp100 gene, M  
343 antigen gene, SCAR 220, SCAR 230 and the ITS region. In this analysis, the first matrix  
344 included *arf*, *antiH*, *tub1* and *ole*. The second matrix included the sequences obtained using the  
345 PCR products of the diagnosis genes target, those sequences were aligned in the order as  
346 shown above and a third matrix included all nine sequences. In all matrices, the  
347 environmental isolates were grouped with the clinical isolates. When the 3 different matrices



348 were analyzed, the trees had the same topology, this suggest that the classical genes are  
349 adequate to achieve the genetic comparison inside the *H. capsulatum* population (Figure 3).  
350 According to the genes characteristics for MLST, the diagnostic genes have less number of  
351 informative sites per gene than the classical targets (Table 1).

352

## 353 **Discussion**

354 Histoplasmosis is the most prevalent endemic mycoses in America. *H. capsulatum*, the  
355 causative agent, is a thermally dimorphic fungus associated with bat/cave environments, bird  
356 droppings, and other diverse environmental sources such as soil and compost.

357 People exposed to *H. capsulatum* can be either asymptomatic or experience life  
358 threatening histoplasmosis depending on a combination of risk factors (4, 41). A better  
359 understanding of the genetic diversity of environmental and clinical isolates *H. capsulatum* in  
360 context of geographical location can help us better understand the risk factors for developing  
361 histoplasmosis. In this study, we showed how *H. capsulatum* strains in Colombia show a  
362 particularly high degree of variation compared to other geographic regions through the  
363 phylogenetic analysis of over 3 environmental and 42 human clinical isolates.

364 Using Hc100 nested PCR, we were able to detect *H. capsulatum* in 39 (9.9%) of 393 of  
365 environmental samples studied. The fact that of the positive samples, 21.9% were found in  
366 non-composted samples compared to only 7.7% of composted samples, suggests that a well-  
367 done composting process could reduce the risk of exposure to *H. capsulatum* when  
368 manipulating the organic fertilizer final product. This is because composting process is a  
369 spontaneous decomposition of organic matter, mainly aerobic, in which bacteria and fungi

370 mainly participate. The organic matter is transformed in a free of toxins and pathogenic  
371 microorganisms fertilizer due to the action of the saprophyte microorganisms. First, they are  
372 better competitors for space and nutrients and second due to their metabolic activity, which  
373 generates an increase in the temperature. These two actions reduce the pathogenic  
374 microorganisms population (42–44). However, the composting process at the beginning,  
375 continuing being a high risk infection source, since we achieve the isolation of *H. capsulatum*  
376 from a raw/not composted chicken manure, that happens to be the most used raw material in  
377 organic fertilizers in Colombia.

378 For the isolation of *H. capsulatum* from environmental samples, the mouse model has  
379 been considered the golden standard technique, but, in this study, we could not isolate the  
380 fungus using it. This procedure is time-consuming, expensive, requires training to handle the  
381 mice and based on previous studies it has a low success rates between 0-50% (5, 6, 8, 19, 20,  
382 45–51). Furthermore, we found the high microbial background in our environmental samples  
383 led to sepsis and subsequent death in many of the mice, further emphasizing the high cost of  
384 such experiments that ultimately failed to recover the *H.capsulatum* isolates. Moreover, the  
385 search for *H. capsulatum* using the mouse model requires the fungus to overcome the  
386 saprophytic microorganisms, evade the immune system and establish an infection in the  
387 mammal host before it can be isolated from affected tissues (5, 6, 8, 19, 20, 45–51). One  
388 challenge associated with this method is that if the fungus has been in the environment for  
389 long time without the exposure to a mammal host, the genes associated with pathogenicity  
390 may not be activated. For example, when the  $\alpha$ -(1-3)-glucan cell wall content has been studied  
391 in *H. capsulatum*, the fungus has been separated into chemotypes I and II; this classification

392 has been related also with its virulence. Most *H. capsulatum* isolates described are chemotype  
393 II, but can lose virulence spontaneously by successive passaging in culture by loss of  $\alpha$ -(1-3)-  
394 glucan in their cell wall (52–54). Nowadays, it is possible to compare isolates using the  
395 proteome analysis. This approach could be used to elucidate genes related to pathogenicity by  
396 comparing gene activity in environmental and clinical isolates (55–57). If environmental  
397 isolates have not activated the virulence genes like the clinical isolates, then the use of the  
398 mouse model for the isolation of *H. capsulatum* from environmental samples would need to be  
399 reconsidered to be the gold standard technique .

400 In contrast, we were able to isolate *H. capsulatum* by the direct culture of the  
401 environmental samples. In cases with high microbial background such as chicken manure  
402 samples, we were able to limit contamination by adding antibiotics to the culture media. Even  
403 though this method also had a low success rate, the recovery of just a few isolates proved to  
404 be very valuable for our study. From our analysis of the 3 isolates from the non-composted  
405 chicken manure sample, we were able demonstrate viable fungus was present in the raw  
406 materials. This has implications for worker safety in industrial contexts, and its necessary take  
407 actions regarding protective measures like wearing high efficient respirators, gloves, boots,  
408 long sleeve shirts and showering at the end of the day. Following these few recommendations  
409 is the best way to avoid the occurrence of occupational outbreaks of histoplasmosis (58). In  
410 order to promote the knowledge about histoplasmosis and how to avoid the infection with *H.*  
411 *capsulatum*, we wrote a booklet to teach people about the disease, the signs and symptoms,  
412 whom is usually expose and how to protect themselves (59).

413           Given the difficulties associated with obtaining isolates from environmental samples,  
414 we probed diagnostic protocols probed, to obtain sequences directly from the environmental  
415 samples to enable comparison between clinical and environmental *H. capsulatum* isolates.  
416 However, none of these methods produced an amplicon from the 39 samples shown to be  
417 positive with the Hc100 nested PCR. Also, given that the trees obtained with the 3 different  
418 had the same topology, the classical genes proposed by Kasuga et al. are adequate to achieve  
419 the genetic comparison inside the *H. capsulatum* population (34, 35, 37–39, 60).

420           Then, Our successful recovery of three *H. capsulatum* isolates from the chicken manure  
421 sample enabled us to genetically compare these strains to 42 human clinical isolates from  
422 Colombia, as well as other isolates from around the world by the classical MLST (34, 35). Our  
423 MLST analysis revealed that the isolates from chicken manure are most closely related to the  
424 clinical strains in Colombia. This finding strongly implicates chicken manure as a source for  
425 exposure and infection by *H. capsulatum*. Previous studies of histoplasmosis outbreaks have  
426 used similar approaches and also been able to establish associations between environmental  
427 and clinical *H. capsulatum* isolates (26, 32, 35).

428           Our work confirming the relatively high diversity of Colombian isolates compared to  
429 populations in other geographical regions (32, 33, 35). Although it is not yet certain why there  
430 is such a high diversity, it is likely related to Colombia's ecological and geographical  
431 characteristics. Colombia has a unique location that serves a crossing point for migratory  
432 birds and bats, which can carry and seed the fungus. This mechanism of dispersal has been  
433 demonstrated by studies of the bat *Tadarida brasiliensis*, whose range correlates well with the  
434 epidemiological map of histoplasmosis. This mechanism may explain the presence of

435 Colombian isolates in the clades that traditionally include isolates from other countries the  
436 bat visits in its migratory route like the United States and Brazil. Furthermore, *H. capsulatum*  
437 has also been isolated from tissues and excreted from both birds and bats (51, 61–66). Also,  
438 since tropical soils tend to be nutritionally poor, organic fertilizers made on chicken manure  
439 sources are commonly used, which creates increased habitat for *H. capsulatum* that overlaps  
440 with human activity. Our data implicates a mechanism of clinical infection originating from  
441 non-composted chicken manure sources. It is therefore likely that the risk of histoplasmosis  
442 can be reduced through complete composting of chicken manure before extensive handling by  
443 people. Risk may also be reduced by, the use of personal protection when exposed to risky  
444 activities like the visit to caves, the demolition or cleaning of old buildings or the manipulation  
445 of excreta of birds and bats and the inclusion of the *H. capsulatum* search during the  
446 composting process. Following these recommendations, cases and outbreaks could be  
447 prevented.

448

#### 449 **Acknowledgments**

450 This study was supported by Comité para el Desarrollo de la Investigación (CODI) of  
451 Universidad de Antioquia, project code 2014-1010 and Departamento Administrativo de  
452 Ciencia, Tecnología e Innovación (Colciencias), Bogotá, Colombia, National Doctorate Program  
453 announcement 647 of 2014 to LFG. The funders had no role in study design, data collection  
454 and analysis, decision to publish or preparation of the manuscript. The authors would like to  
455 acknowledge to the members of the participant research groups for feedback and  
456 improvement suggestions. We thank to David Sexton for English editing of the manuscript.

457 **References**

458

- 459 1. Kauffman CA. 2009. Histoplasmosis. *Clin Chest Med* 30:217–225.
- 460 2. Scheel CM, Gómez BL. 2014. Diagnostic Methods for Histoplasmosis: Focus on Endemic  
461 Countries with Variable Infrastructure Levels. *Curr Trop Med Reports* 129–137.
- 462 3. Knox KS, Hage CA. 2010. Histoplasmosis. *Proc Am Thorac Soc* 7:169–72.
- 463 4. Guimarães AJ, Nosanchuk JD, Zancopé-Oliveira RM. 2006. Diagnosis of histoplasmosis.  
464 *Braz J Microbiol* 37:1–13.
- 465 5. Emmons C. 1949. Isolation of *Histoplasma capsulatum* from Soil. *Public Heal Reports*  
466 64:892–896.
- 467 6. EMMONS CW. 1958. Association of bats with histoplasmosis. *Public Heal reports*  
468 (Washington, DC 1896) 73:590–5.
- 469 7. Emmons C. 1950. Histoplasmosis: Animal Reservoirs and Other Sources in Nature of  
470 Pathogenic Fungus, *Histoplasma*. *Am J Public Health Nations Health* 40:436–40.
- 471 8. Ajello L. 1964. [Relationship of *Histoplasma capsulatum* with hens and other birds]. *Bol*  
472 *Oficina Sanit Panam* 56:232–6.
- 473 9. McVeigh I, Morton K. 1965. Nutritional studies of *Histoplasma capsulatum*. *Mycopathol*  
474 *Mycol Appl* 25:294–308.
- 475 10. Wheat LJ, Slama TG, Eitzen HE, Kohler RB, French ML, Biesecker JL. 1981. A large urban  
476 outbreak of histoplasmosis: clinical features. *Ann Intern Med* 94:331–7.
- 477 11. Pladson TR, Stiles MA, Kuritsky JN. 1984. Pulmonary histoplasmosis. A possible risk in  
478 people who cut decayed wood. *Chest* 86:435–8.

- 479 12. Morse DL, Gordon MA, Matte T, Eadie G. 1985. An outbreak of histoplasmosis in a  
480 prison. *Am J Epidemiol* 122:253–61.
- 481 13. Storch G, Burford JG, George RB, Kaufman L, Ajello L. 1980. Acute histoplasmosis.  
482 Description of an outbreak in northern Louisiana. *Chest* 77:38–42.
- 483 14. Sacks JJ, Ajello L, Crockett LK. 1986. An outbreak and review of cave-associated  
484 histoplasmosis capsulati. *Med Mycol* 24:313–327.
- 485 15. Stobierski MG, Hospedales CJ, Hall WN, Robinson-Dunn B, Hoch D, Sheill D a. 1996.  
486 Outbreak of histoplasmosis among employees in a paper factory--Michigan, 1993. *J Clin*  
487 *Microbiol* 34:1220–3.
- 488 16. Ordóñez N, Tobón A, Arango M, Tabares A, De Bedout C, Gómez B, Castañeda E,  
489 Restrepo A. 1997. Brotes de histoplasmosis registrados en el área andina colombiana.  
490 *Biomédica* 17:105.
- 491 17. Ashford D a, Hajjeh R a, Kelley MF, Kaufman L, Hutwagner L, McNeil MM. 1999.  
492 Outbreak of histoplasmosis among cavers attending the National Speleological Society  
493 Annual Convention, Texas, 1994. *Am J Trop Med Hyg* 60:899–903.
- 494 18. Litvintseva AP, Brandt ME, Mody RK, Lockhart SR. 2015. Investigating Fungal Outbreaks  
495 in the 21st Century. *PLOS Pathog* 11:e1004804.
- 496 19. Taylor ML, Ruíz-Palacios GM, Reyes-Montes MDR, Rodríguez-Arellanes G, Carreto-  
497 Binaghi LE, Duarte-Escalante E, Hernández-Ramírez A, Pérez A, Suárez-Alvarez RO,  
498 Roldán-Aragón Y a., Romero-Martínez R, Sahaza-Cardona JH, Sifuentes-Osornio J, Soto-  
499 Ramírez LE, Peña-Sandoval GR. 2005. Identification of the infectious source of an  
500 unusual outbreak of histoplasmosis, in a hotel in Acapulco, state of Guerrero, Mexico.

- 501 FEMS Immunol Med Microbiol 45:435–41.
- 502 20. Jiménez RA, Urán ME, de Bedout C, Arango M, Tobón AM, Cano LE, Restrepo A. 2002.  
503 [Outbreak of acute histoplasmosis in a family group: identification of the infection  
504 source]. *Biomedica* 22:155–9.
- 505 21. Muñoz B, Martínez M a Á, Palma G, Ramírez A, Frías MG, Reyes MR, Taylor ML, Higuera  
506 AL, Corcho A, Manjarrez ME. 2010. Molecular characterization of *Histoplasma*  
507 *capsulatum* isolated from an outbreak in treasure hunters *Histoplasma capsulatum* in  
508 treasure hunters. *BMC Infect Dis* 10:264.
- 509 22. Negroni R, Duré R, Ortiz Nareto Á, Arechavala A, Maiolo E, Santiso G, Iovannitti C,  
510 Ibarra-Camou B, Canteros C. 2010. Brote de histoplasmosis en la Escuela de Cadetes de  
511 la Base Aérea de Morón, Provincia de Buenos Aires, República Argentina. *Rev Argent*  
512 *Microbiol* 42:254–260.
- 513 23. Centers for Disease Control and Prevention. 2001. Public Health Dispatch: Update:  
514 Outbreak of Acute Febrile Respiratory Illness Among College Students --- Acapulco,  
515 Mexico, March 2001.
- 516 24. Castañeda E, De Coppiano CI, Raad J, Ajello L, Weeks R, Marin H, Coppiano T, Jimenez H.  
517 1983. Brote epidemico de histoplasmosis asociado con exposicion a un arbol hueco.  
518 *Acta Médica Colomb* 8:17–22.
- 519 25. Gómez LF, Torres IP, Jiménez-A MDP, McEwen JG, de Bedout C, Peláez CA, Acevedo JM,  
520 Taylor ML, Arango M. 2018. Detection of *Histoplasma capsulatum* in Organic Fertilizers  
521 by Hc100 Nested Polymerase Chain Reaction and Its Correlation with the  
522 Physicochemical and Microbiological Characteristics of the Samples. *Am J Trop Med Hyg*



- 523 98:1303–1312.
- 524 26. Keath EJ, Kobayashi GS, Medoff G. 1992. Typing of *Histoplasma capsulatum* by  
525 restriction fragment length polymorphisms in a nuclear gene. *J Clin Microbiol* 30:2104–  
526 7.
- 527 27. Spitzer ED, Lasker B a, Travis SJ, Kobayashi GS, Medoff G. 1989. Use of mitochondrial  
528 and ribosomal DNA polymorphisms to classify clinical and soil isolates of *Histoplasma*  
529 *capsulatum*. *Infect Immun* 57:1409–12.
- 530 28. Poonwan N, Imai T, Mekha N, Yazawa K, Mikami Y, Ando A, Nagata Y. 1998. Genetic  
531 analysis of *Histoplasma capsulatum* strains isolated from clinical specimens in thailand  
532 by a PCR-based random amplified polymorphic DNA method. *J Clin Microbiol* 36:3073–  
533 3076.
- 534 29. Vincent RD, Goewert R, Goldman WE, Kobayashi GS, Lambowitz a. M, Medoff G. 1986.  
535 Classification of *Histoplasma capsulatum* isolates by restriction fragment  
536 polymorphisms. *J Bacteriol* 165:813–8.
- 537 30. Kersulyte D, Woods JP, Keath EJ, Goldman WE, Berg DE. 1992. Diversity among clinical  
538 isolates of *Histoplasma capsulatum* detected by polymerase chain reaction with  
539 arbitrary primers. *J Bacteriol* 174:7075–9.
- 540 31. Carter D a, Taylor JW, Dechairo B, Burt a, Koenig GL, White TJ. 2001. Amplified single-  
541 nucleotide polymorphisms and a (GA)(n) microsatellite marker reveal genetic  
542 differentiation between populations of *Histoplasma capsulatum* from the Americas.  
543 *Fungal Genet Biol* 34:37–48.
- 544 32. Teixeira M de M, Patané JSL, Taylor ML, Gómez BL, Theodoro RC, de Hoog S, Engelthaler

- 545 DM, Zancopé-Oliveira RM, Felipe MSS, Barker BM. 2016. Worldwide Phylogenetic  
546 Distributions and Population Dynamics of the Genus *Histoplasma*. *PLoS Negl Trop Dis*  
547 10:e0004732.
- 548 33. Sepúlveda VE, Márquez R, Turissini DA, Goldman WE, Matute DR. 2017. Genome  
549 Sequences Reveal Cryptic Speciation in the Human Pathogen *Histoplasma capsulatum*.  
550 *MBio* 8:1–23.
- 551 34. Kasuga T, Taylor JW, White TJ. 1999. Phylogenetic relationships of varieties and  
552 geographical groups of the human pathogenic fungus *Histoplasma capsulatum* Darling. *J*  
553 *Clin Microbiol* 37:653–63.
- 554 35. Kasuga T, White TJ, Koenig G, McEwen J, Restrepo A, Castañeda E, Da Silva Lacaz C,  
555 Heins-Vaccari EM, De Freitas RS, Zancopé-Oliveira RM, Qin Z, Negroni R, Carter D a.,  
556 Mikami Y, Tamura M, Taylor ML, Miller GF, Poonwan N, Taylor JW. 2003.  
557 Phylogeography of the fungal pathogen *Histoplasma capsulatum*. *Mol Ecol* 12:3383–  
558 401.
- 559 36. Porta a, Colonna-Romano S, Callebaut I, Franco a, Marzullo L, Kobayashi GS, Maresca B.  
560 1999. An homologue of the human 100-kDa protein (p100) is differentially expressed  
561 by *Histoplasma capsulatum* during infection of murine macrophages. *Biochem Biophys*  
562 *Res Commun* 254:605–13.
- 563 37. Bialek R, Feucht A, Aepinus C, Just-Nübling G, Robertson VJ, Knobloch J, Hohle R. 2002.  
564 Evaluation of two nested PCR assays for detection of *Histoplasma capsulatum* DNA in  
565 human tissue. *J Clin Microbiol* 40:1644–7.
- 566 38. De Matos Guedes HL, Guimaraes AJ, De Medeiros Muniz M, Vera Pizzini C, Hamilton AJ,

- 567 Peralta JM, Deepe GS, Zancope-Oliveira RM. 2003. PCR Assay for Identification of  
568 *Histoplasma capsulatum* Based on the Nucleotide Sequence of the M Antigen. *J Clin*  
569 *Microbiol* 41:535–539.
- 570 39. Frías De León MG, Arenas López G, Taylor ML, Acosta Altamirano G, Reyes-Montes MDR.  
571 2012. Development of specific sequence-characterized amplified region markers for  
572 detecting *Histoplasma capsulatum* in clinical and environmental samples. *J Clin*  
573 *Microbiol* 50:673–9.
- 574 40. Sambrook J, Russell DW. 2001. *Molecular Cloning. A laboratory manual*, p. 2025. *In* Cold  
575 Spring Harbor Laboratory Press (ed.), *Molecular Cloning* Third edit. New York.
- 576 41. Aidé MA. 2009. Chapter 4--histoplasmosis. *J Bras Pneumol* 35:1145–51.
- 577 42. Zucconi F de, De Bertoldi M. 1987. Compost specifications for the production and  
578 characterization of compost from municipal solid waste.
- 579 43. Bernal MP, Albuquerque J a, Moral R. 2009. Composting of animal manures and  
580 chemical criteria for compost maturity assessment. A review. *Bioresour Technol*  
581 100:5444–53.
- 582 44. Gómez RB. 2006. Compostaje de residuos sólidos orgánicos. Aplicación de técnicas  
583 respirométricas en el seguimiento del proceso.
- 584 45. Huhn GD, Austin C, Carr M, Heyer D, Boudreau P, Gilbert G, Eimen T, Lindsley MD, Cali S,  
585 Conover CS, Dworkin MS. 2005. Two Outbreaks of Occupationally Acquired  
586 Histoplasmosis: More than Workers at Risk. *Environ Health Perspect* 113:585–589.
- 587 46. Negroni R, Duré R, Ortiz Nareto A, Arechavala AI, Maiolo EI, Santiso GM, Iovannitti C,  
588 Ibarra-Camou B, Canteros CE. 1998. Histoplasmosis outbreak in Morón, Buenos Aires

- 589 Province, Argentina. Rev Argent Microbiol 42:254–60.
- 590 47. Zeidberg LD, Ajello L, Dillon A, Runyon LC. 1952. Isolation of histoplasma capsulatum  
591 from soil. Am J Public Health Nations Health 42:930–5.
- 592 48. Hazen EL, Little GN, Mordaunt V. 1956. Isolation of Histoplasma capsulatum from two  
593 natural sources in the Mohawk Valley; one the probable point source of two cases of  
594 histoplasmosis. Am J Public Health Nations Health 46:880–5.
- 595 49. Brandsberg JW, Weeks RJ, Hill WB, Piggott WR. 1969. A study of fungi found in  
596 association with Histoplasma capsulatum: three bird roosts in S. E. Missouri, U.S.A.  
597 Mycopathol Mycol Appl 38:71–81.
- 598 50. Disalvo AF, Bigler WJ, Ajello L, Johnson JE, Palmer J. 1970. Bat and soil studies for  
599 sources of histoplasmosis in Florida. Public Heal reports (Washington, DC 1896)  
600 85:1063–9.
- 601 51. Moncada LH, Muñoz J, Pineda F, Ferreira G. 1989. Estudio de la presencia de  
602 histoplasma capsulatum en la tierra de 4 cuevas localizadas de la región de Río Claro  
603 (Antioquia). Iatreia 2:195–200.
- 604 52. Rappleye CA, Eissenberg LG, Goldman WE. 2007. Histoplasma capsulatum alpha-(1,3)-  
605 glucan blocks innate immune recognition by the beta-glucan receptor. Proc Natl Acad  
606 Sci U S A 104:1366–70.
- 607 53. Sepúlveda VE, Williams CL, Goldman WE, Sepulveda VE, Williams CL, Goldman WE.  
608 2014. Comparison of phylogenetically distinct Histoplasma strains reveals  
609 evolutionarily divergent virulence strategies. MBio 5:e01376-14.
- 610 54. Holbrook ED, Rappleye C a. 2008. Histoplasma capsulatum pathogenesis: making a

- 611 lifestyle switch. *Curr Opin Microbiol* 11:318–24.
- 612 55. Kasap M, Karadenizli A, Akpınar G, Uzuner H, Ayimugu A, Karaosmanoğlu K, Er DK.  
613 2017. Comparative Analysis of Proteome Patterns of *Francisella tularensis* Isolates from  
614 Patients and the Environment. *Curr Microbiol* 74:230–238.
- 615 56. Montagna MT, De Donno A, Caggiano G, Serio F, De Giglio O, Bagordo F, D’Amicis R,  
616 Lockhart SR, Cogliati M. 2018. Molecular characterization of *Cryptococcus neoformans*  
617 and *Cryptococcus gattii* from environmental sources and genetic comparison with  
618 clinical isolates in Apulia, Italy. *Environ Res* 160:347–352.
- 619 57. Jun H, Guangye H, Daiwen C. 2013. Insights into enzyme secretion by filamentous fungi:  
620 comparative proteome analysis of *Trichoderma reesei* grown on different carbon  
621 sources. *J Proteomics* 89:191–201.
- 622 58. Lenhart SW, Schafer MP, Singal M, Hajjeh RA. 2004. Histoplasmosis; protecting workers  
623 at riskCenters for Disease Control and Prevention National.
- 624 59. Gómez LF, Barrera S, Jiménez M del P, de Bedout C, Torres IP, Pelaéz C, Acevedo JM,  
625 Taylor ML, Arango M. 2017. Histoplasmosis y compostaje: ¿Estoy en riesgo de  
626 infectarme?Primera ed. Medellín.
- 627 60. Ohno H, Tanabe K, Umeyama T, Kaneko Y, Yamagoe S, Miyazaki Y. 2013. Application of  
628 nested PCR for diagnosis of histoplasmosis. *J Infect Chemother* 19:999–1003.
- 629 61. González-González a. E, Aliouat-Denis CM, Carreto-Binaghi LE, Ramírez J a., Rodríguez-  
630 Arellanes G, Demanche C, Chabé M, Aliouat EM, Dei-Cas E, Taylor ML. 2012. An Hcp100  
631 gene fragment reveals *Histoplasma capsulatum* presence in lungs of *Tadarida*  
632 *brasiliensis* migratory bats. *Epidemiol Infect* 140:1955–63.

- 633 62. Chávez-Tapia CB, Peña-Sandoval G, Rodríguez-Arellanes G, Reyes-Montes M del R,  
634 Duarte-Escalante E, Taylor ML. 2005. Aislamiento de *Histoplasma capsulatum* en los  
635 murciélagos *Desmodus rotundus* (no migratorio) y *Tadarida brasiliensis* (migratorio de  
636 larga distancia): primeros registros en Mexico. *Rev Mex Micol* 20:61–70.
- 637 63. Dias MAG, Oliveira RMZ, Giudice MC, Netto HM, Jordão LR, Grigorio IM, Rosa AR,  
638 Amorim J, Nosanchuk JD, Travassos LR, Taborda CP. 2011. Isolation of *Histoplasma*  
639 *capsulatum* from bats in the urban area of São Paulo State, Brazil. *Epidemiol Infect*  
640 139:1642–4.
- 641 64. Bartlett PC, Weeks RJ, Ajello L. Decontamination of a *Histoplasma capsulatum*-infested  
642 bird roost in Illinois. *Arch Environ Health* 37:221–3.
- 643 65. Reyes-Montes MR, Rodríguez-Arellanes G, Pérez-Torres a, Rosas-Rosas a G, Parás-  
644 García a, Juan-Sallés C, Taylor ML. 2009. Identification of the source of histoplasmosis  
645 infection in two captive maras (*Dolichotis patagonum*) from the same colony by using  
646 molecular and immunologic assays. *Rev Argent Microbiol* 41:102–4.
- 647 66. Tesh RB, Schneidau JD. 1966. Experimental infection of North American insectivorous  
648 bats (*Tadarida brasiliensis*) with *Histoplasma capsulatum*. *Am J Trop Med Hyg* 15:544–  
649 50.
- 650

651 **Data Accessibility**

652 Genbank accession numbers ADP ribosylation factor (*arf*) MH338036 to MH338080, H  
653 antigen precursor (*anti-H*) MH122839 to MH122883, Delta-9 fatty acid desaturase (*ole1*)  
654 MH338126 to MH338170, Alpha-tubulin (*tub1*) MH338081 to MH338125, Hcp100 gene, 100  
655 kDa protein MH122794 to MH122838, internal transcribed spacer (ITS) MH339542 to  
656 MH339586, SCAR markers 220 and 230 MH348521 to MH348610.

657

**Table 1.** List the sequence name, the length in the present analysis and the number and percentage of the informative sites.

| <b>Sequence</b> | <b>Length</b> | <b>Informative sites</b> | <b>Percentage informative sites</b> |
|-----------------|---------------|--------------------------|-------------------------------------|
| <b>arf</b>      | 435           | 7                        | 1,6                                 |
| <b>anti H</b>   | 373           | 6                        | 1,6                                 |
| <b>ole</b>      | 383           | 3                        | 0,7                                 |
| <b>tub</b>      | 218           | 3                        | 1,3                                 |
| <b>ITS</b>      | 608           | 4                        | 0,6                                 |
| <b>Hcp 100</b>  | 184           | 1                        | 0,5                                 |
| <b>anti M</b>   | 276           | 7                        | 2,5                                 |
| <b>SCARS</b>    | 180           | 5                        | 2,7                                 |
| <b>220</b>      |               |                          |                                     |
| <b>SCARS</b>    | 152           | 1                        | 0,6                                 |
| <b>230</b>      |               |                          |                                     |

bioRxiv preprint doi: <https://doi.org/10.1101/449876>; this version posted October 22, 2018. The copyright holder for this preprint (which was not certified by peer review) is the author/funder, who has granted bioRxiv a license to display the preprint in perpetuity. It is made available under aCC-BY 4.0 International license.



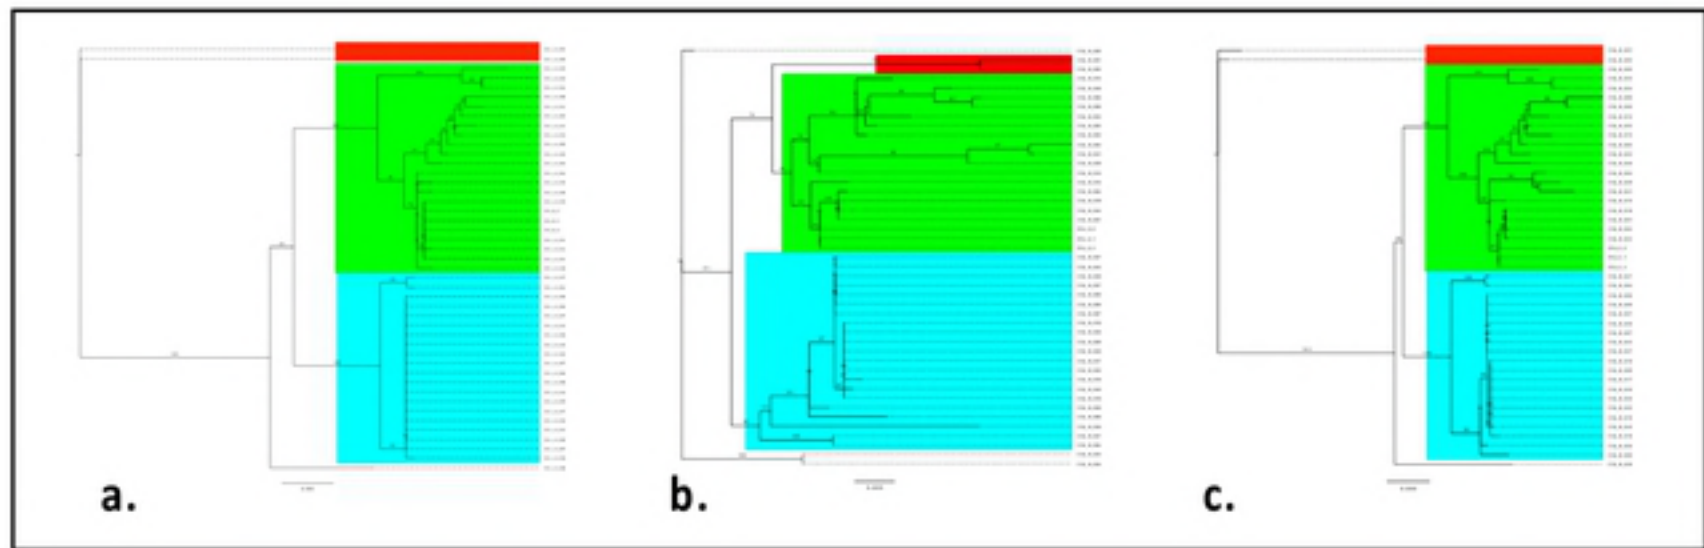

**Figure 3.** The phylogenetic analysis of the *H.capsulatum* Colombian population.

All trees showed the same topology although there were built with different

group of genes in the order as follow, **a.** *arf*, *antiH*, *tub1* and *ole*. **b.** Hcp100 gene,

bioRxiv preprint doi: <https://doi.org/10.1101/449876>; this version posted October 22, 2018. The copyright holder for this preprint (which was not certified by peer review) is the author/funder, who has granted bioRxiv a license to display the preprint in perpetuity. It is made available under aCC-BY 4.0 International license.

M antigen gene, SCAR 220, SCAR 230 and the ITS region and **c.** Consensus tree of

all 9 sequences *arf*, *antiH*, *tub1*, *ole*, Hcp100 gene, M antigen gene, SCAR 220,

SCAR 230 and the ITS region.

bioRxiv preprint doi: <https://doi.org/10.1101/449876>; this version posted October 22, 2018. The copyright holder for this preprint (which was not certified by peer review) is the author/funder, who has granted bioRxiv a license to display the preprint in perpetuity. It is made available under aCC-BY 4.0 International license.

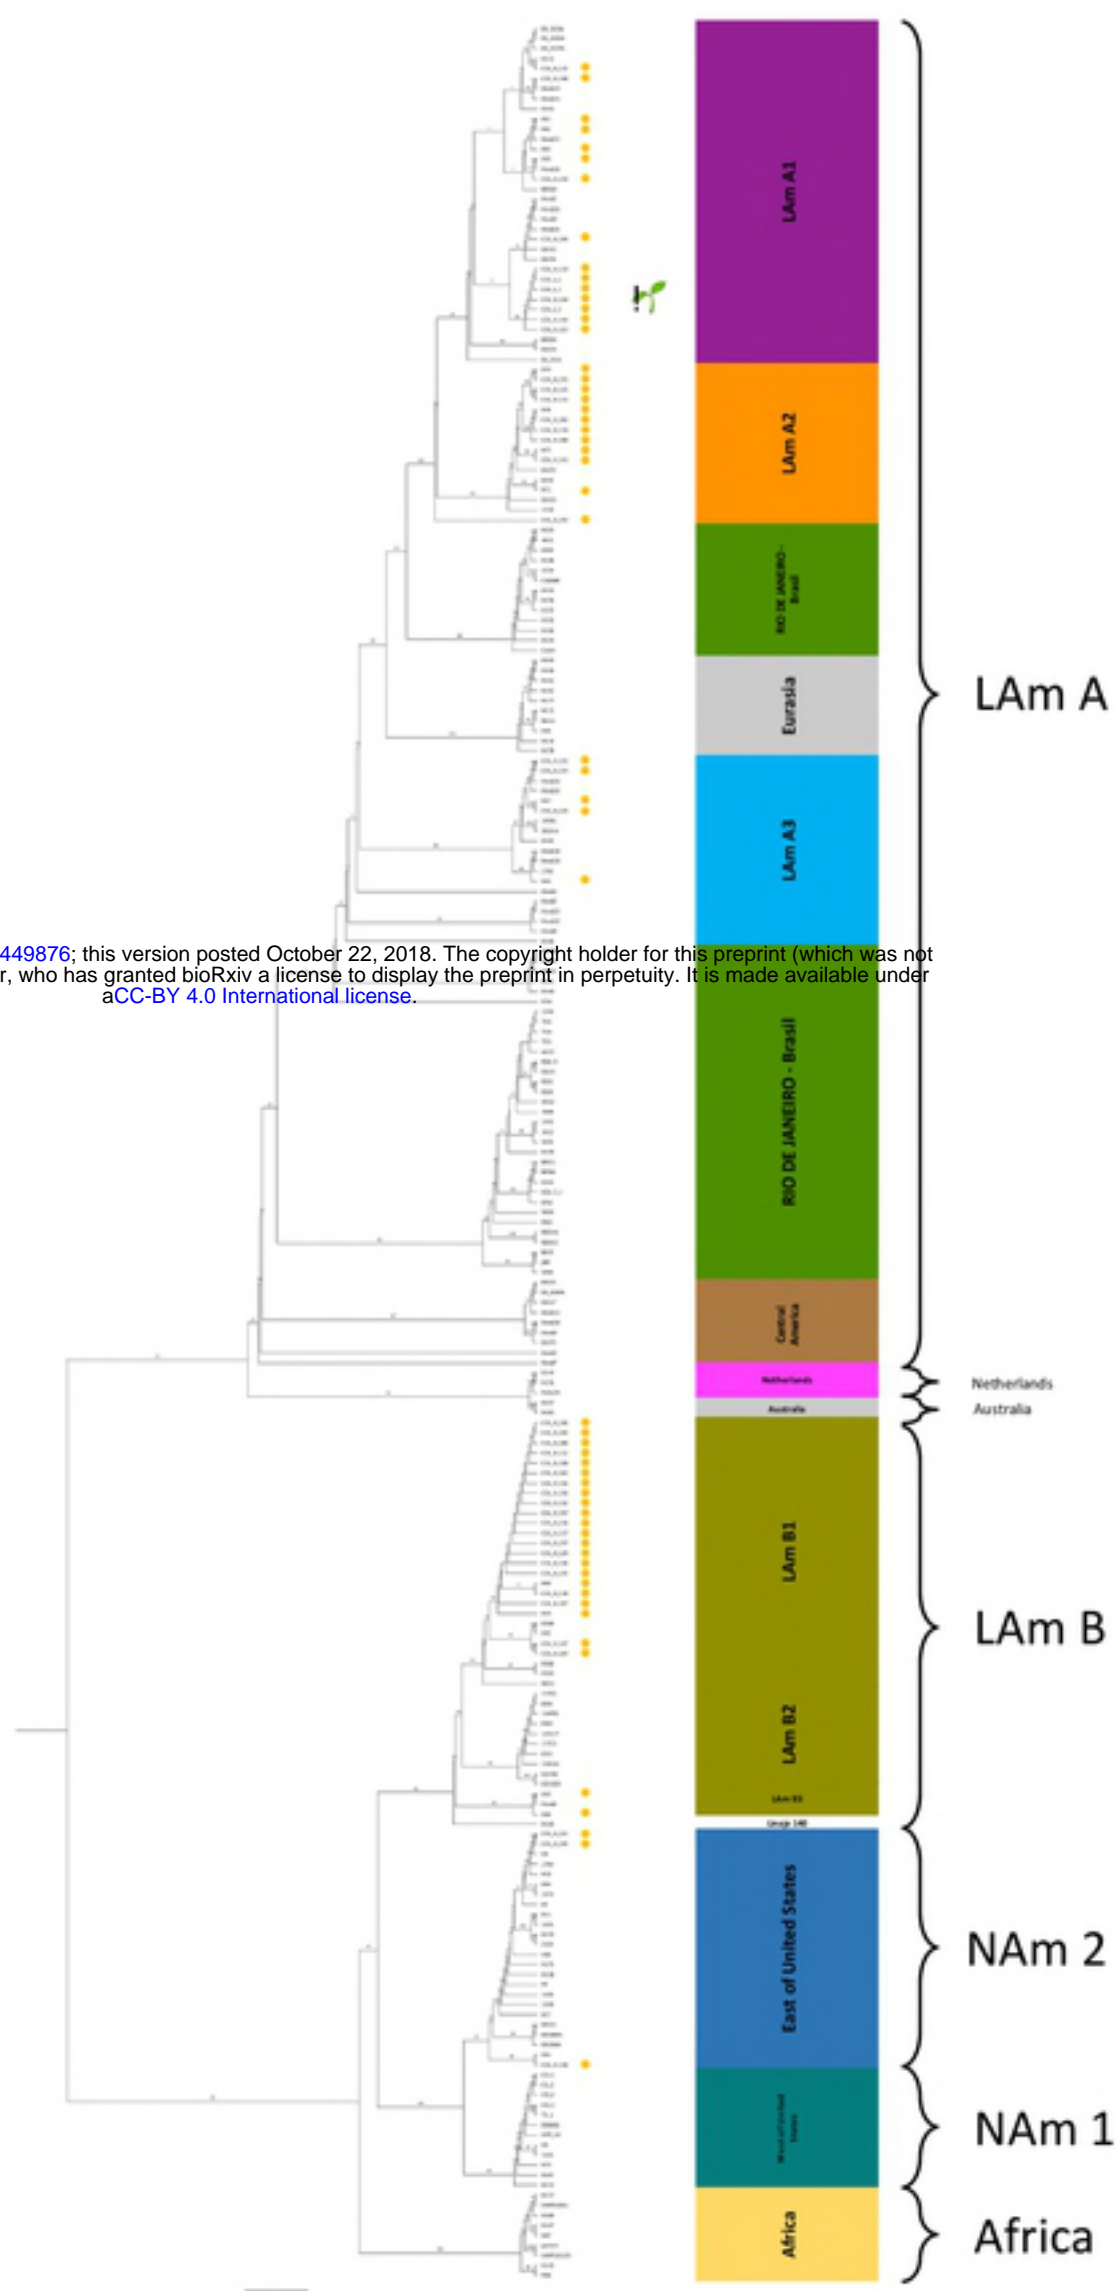

**Figure 2.** Genetic comparison of *H.capsulatum* Colombian isolates. The groups obtained, were separated when bootstraps were over 70%. The contrast between our results and the Teixeira et al. (2016) (middle list) and the Kasuga et

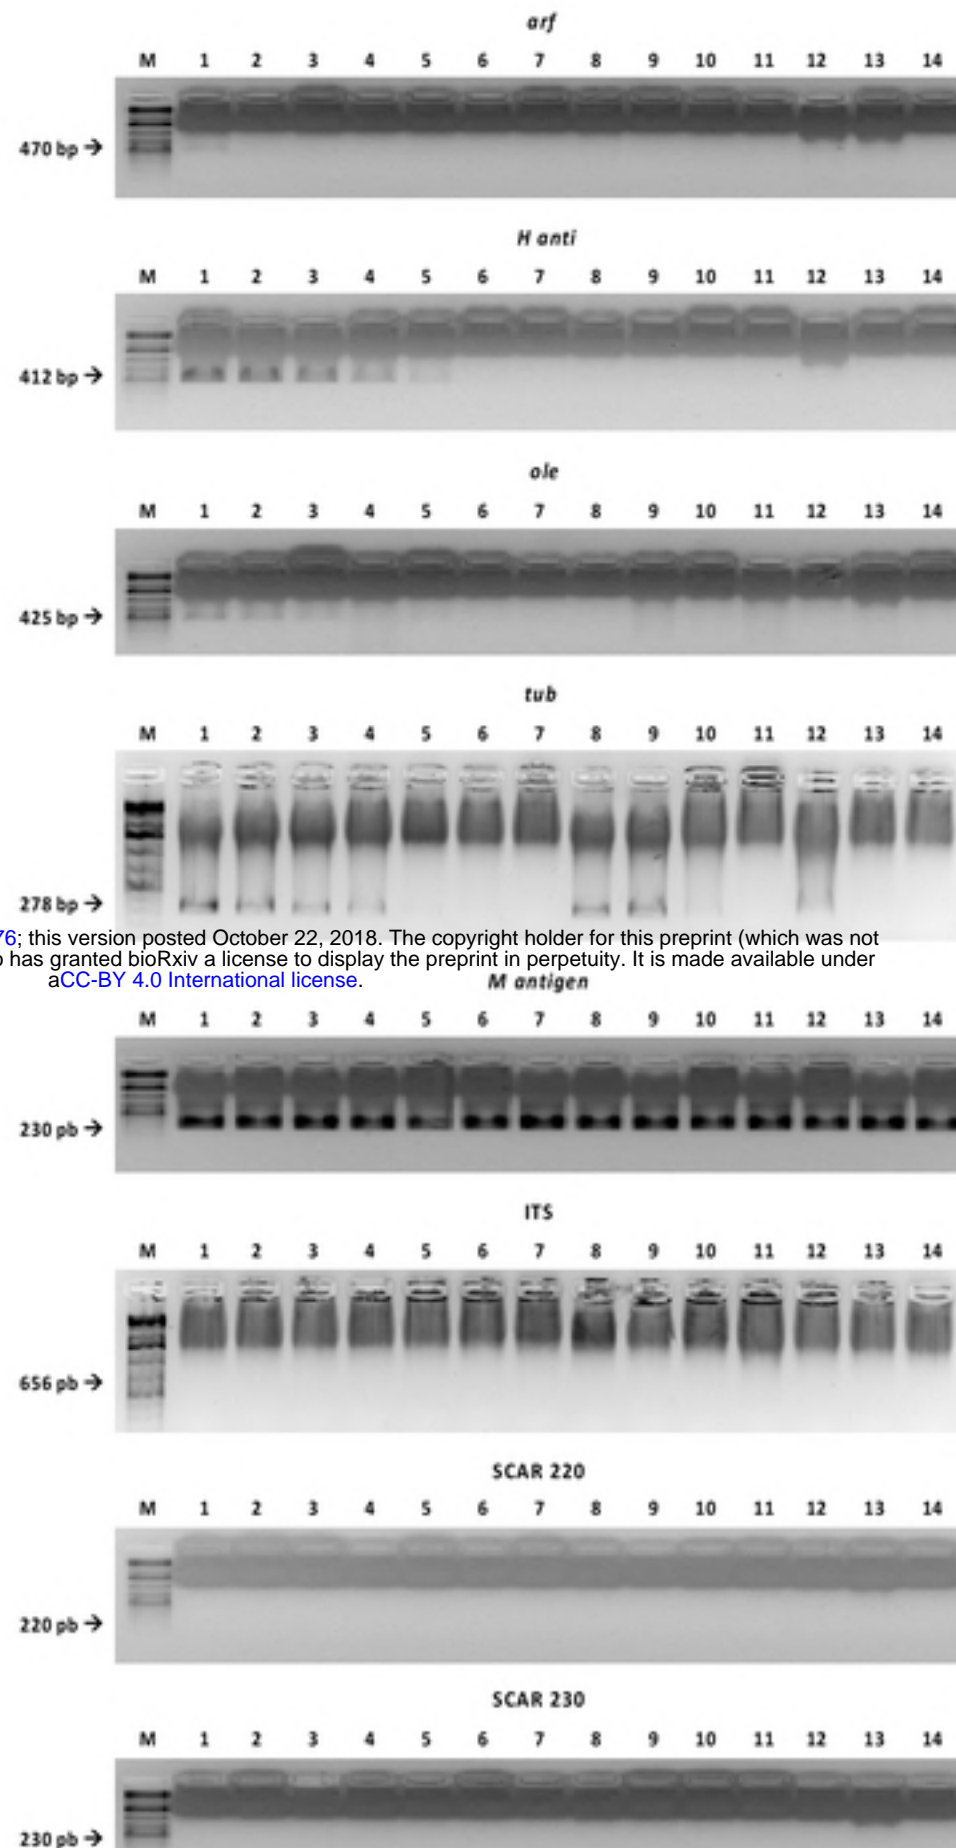

bioRxiv preprint doi: <https://doi.org/10.1101/449876>; this version posted October 22, 2018. The copyright holder for this preprint (which was not certified by peer review) is the author/funder, who has granted bioRxiv a license to display the preprint in perpetuity. It is made available under aCC-BY 4.0 International license.

**Figure 1.** Detection limit, specificity and the ability to detect *H. capsulatum* DNA in environmental samples with the MLST and diagnostic PCR reactions. Line M: marker, line 1: 2 ng/μl, line 2: 1 ng/μl, line 3: 500 pg/μl, line 4: 200 pg/μl, line 5: 100 pg/μl, line 6: 50 pg/μl, line 7: 20 pg/μl, line 8: *Paracoccidioides brasiliensis* sensu stricto (Pb 18), line 9: *Paracoccidioides* spp (Pb 339), line 10: *Paracoccidioides restrepiensis* (PB 60855), line 11: *Coccidioides* spp, line 12:
